# Supplementary material for: Implications of specific lysine residues within ataxin-3 for the molecular pathogenesis of Machado-Joseph disease
Source: PubMed Central journal article supplement (PMC10235640; doi:10.3389/fnmol.2023.1133271), 2023-05-19
Supplement: Data_Sheet_1.pdf [file Data_Sheet_1.pdf]

## **Frontiers in Molecular Neuroscience**

### **Original Research**

# **Implications of specific lysine residues of ataxin-3 for the molecular pathogenesis of Machado-Joseph disease**

Priscila Pereira Sena<sup>1</sup>, Jonasz Jeremiasz Weber<sup>1,2</sup>, Sercan Bayezit<sup>1</sup>, Rafael Saup<sup>1</sup>, Rana Dilara Incebacak Eltemur<sup>1,2</sup>, Xiaoling Li<sup>1</sup>, Ana Velic<sup>3</sup>, Jaqueline Jung<sup>1</sup>, Boris Macek<sup>3</sup>, Huu Phuc Nguyen<sup>2</sup>, Olaf Riess<sup>1</sup>, Thorsten Schmidt<sup>1,\*</sup>

<sup>1</sup> Institute of Medical Genetics and Applied Genomics, University of Tübingen, Tübingen, Germany

<sup>2</sup> Department of Human Genetics, Ruhr University Bochum, Bochum, Germany

<sup>3</sup> Proteome Center Tübingen, University of Tübingen, 72076, Tübingen, Germany

#### **\* Correspondence**

Thorsten Schmidt

thorsten.schmidt@med.uni-tuebingen.de

## Supplementary data

### Supplementary figures

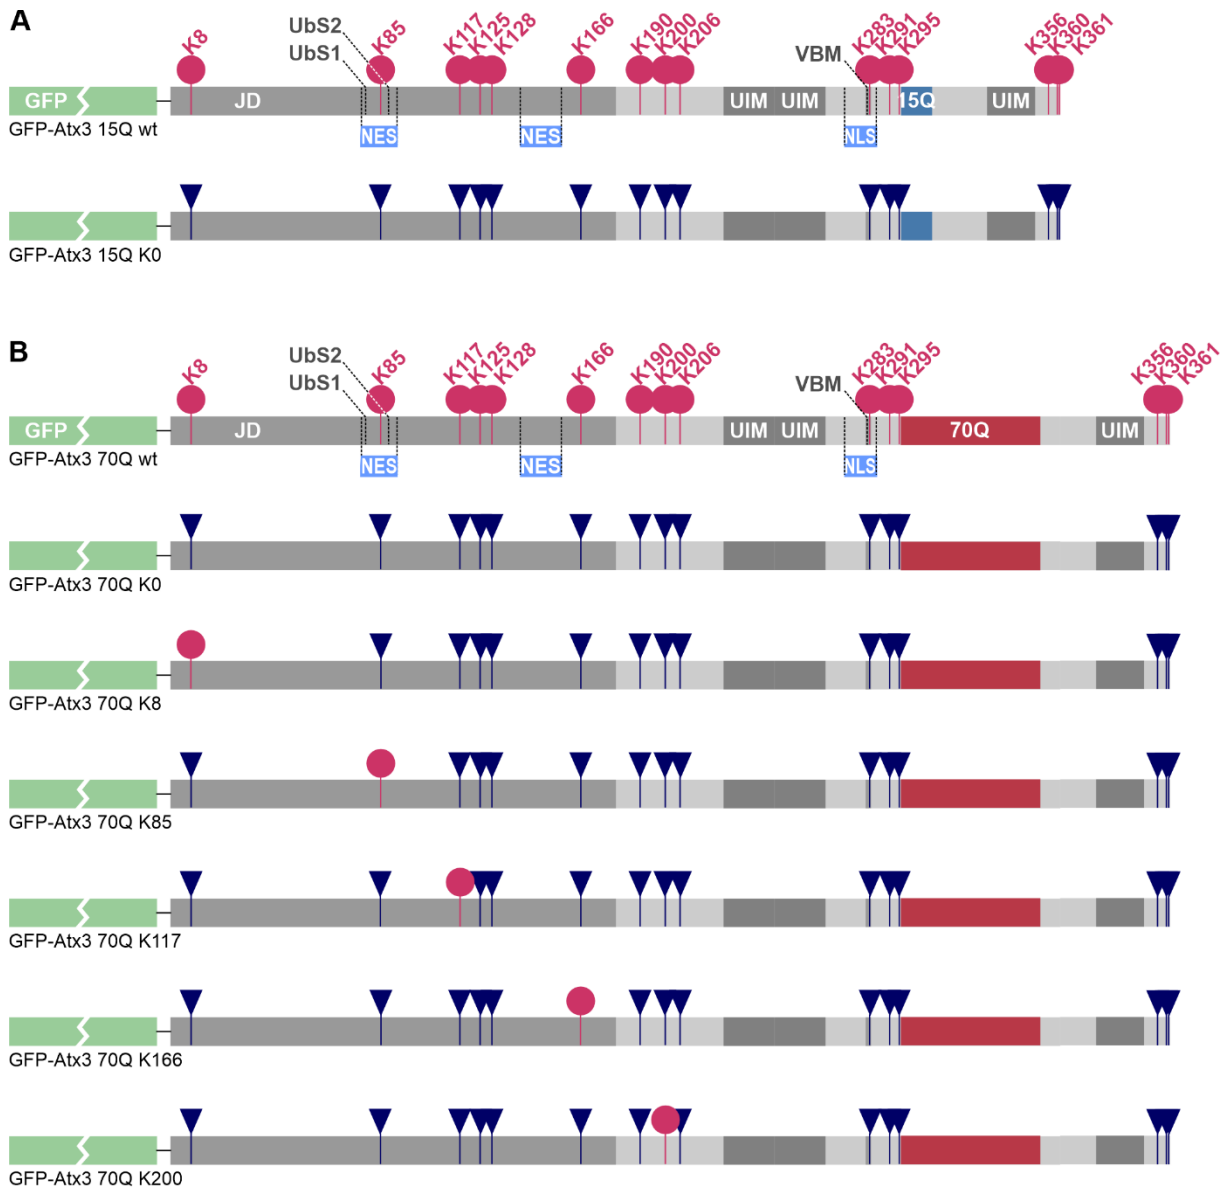

**Supplementary Figure 1. Schematic representation of the GFP-tagged ataxin-3 overexpression constructs used in this study.** All lysine residues (K; pink circles) within ataxin-3 containing 15 (**A**) or 70 (**B**) glutamines (Q) were converted to arginine (R; dark blue inverted triangles). (**B**) Single lysine residues of interest within Atx3 70Q were reactivated (exemplified by the pink circles). JD, Josephin domain; NES, nuclear export signal; NLS, nuclear localization signal; pQ, polyglutamine stretch; UbS, ubiquitin-binding site; UIM, ubiquitin-interacting motif; VBM, VCP-binding motif.

## Lysine residues of ataxin-3

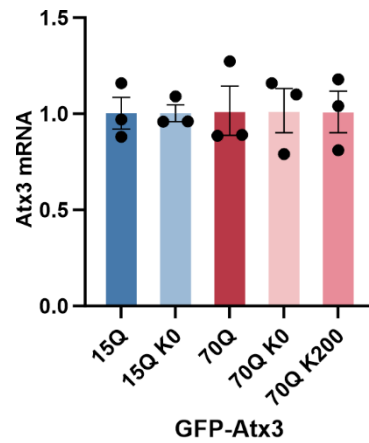

### **Supplementary Figure 2. Ataxin-3 variants do not differ in their mRNA expression levels.**

Analysis via qRT-PCR for GFP-Atx3 expression in respectively transfected 293T *ATXN3*<sup>-/-</sup> cells presented no differences at the mRNA level between the investigated ataxin-3 variants, with neither CAG repeat length nor presence or absence of lysine residues showing effects.

## Lysine residues of ataxin-3

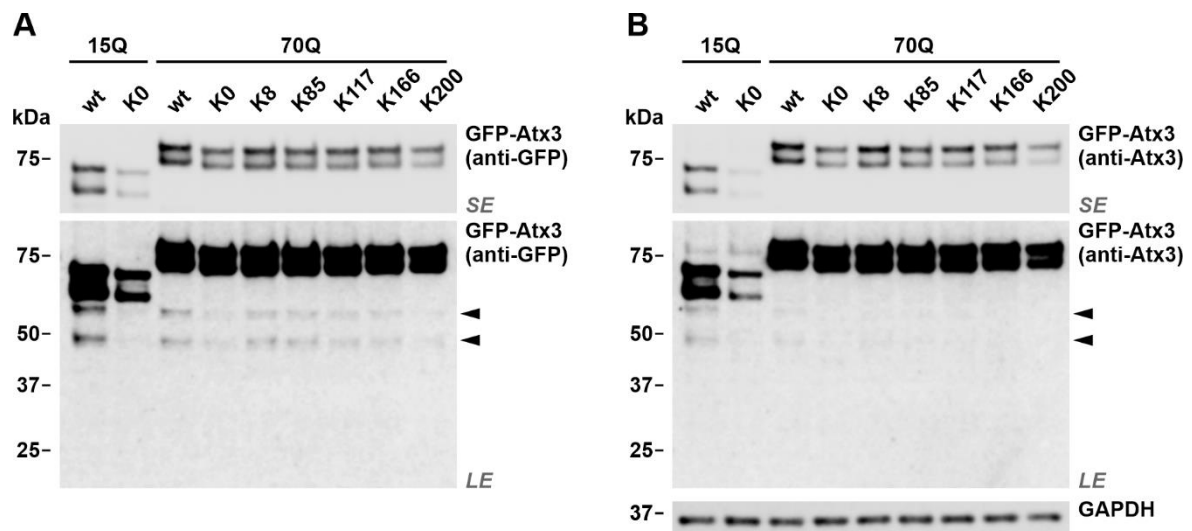

**Supplementary Figure 3. Ataxin-3 variants do not show major changes in their baseline fragmentation pattern. (A and B)** Western blot analysis of protein extracts from 293T *ATXN3*<sup>-/-</sup> cells transfected with various GFP-tagged ataxin-3 (GFP-Atx3) variants for 72 h. The same membrane was probed with antibodies against GFP (**A**) or the N-terminus of ataxin-3 (**B**). GAPDH served as loading control. Arrowheads point to potential proteolytic fragments of ataxin-3. *SE* = short exposure, *LE* = long exposure.

## Lysine residues of ataxin-3

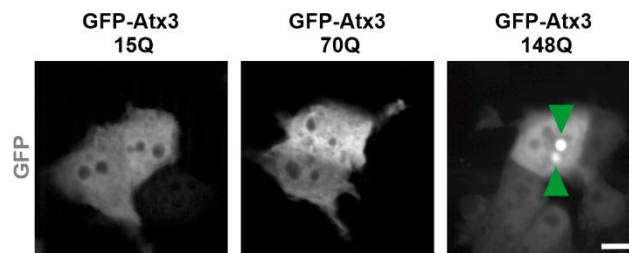

**Supplementary Figure 4. Ataxin-3 70Q does not form microscopically detectable intracellular inclusion bodies.** Fluorescence microscopy analysis of 293T *ATXN3*<sup>-/-</sup> cells transfected with GFP-Atx3 15Q, 70Q, or 148Q for 72 h demonstrated a comparable intracellular distribution of ataxin-3 independent of its polyQ length. All ataxin-3 variants are evenly localized in the cytoplasm and the nucleus, while only GFP-Atx3 148Q formed microscopically visible intracellular inclusion bodies (green arrowheads). Scale bar = 10  $\mu$ m.

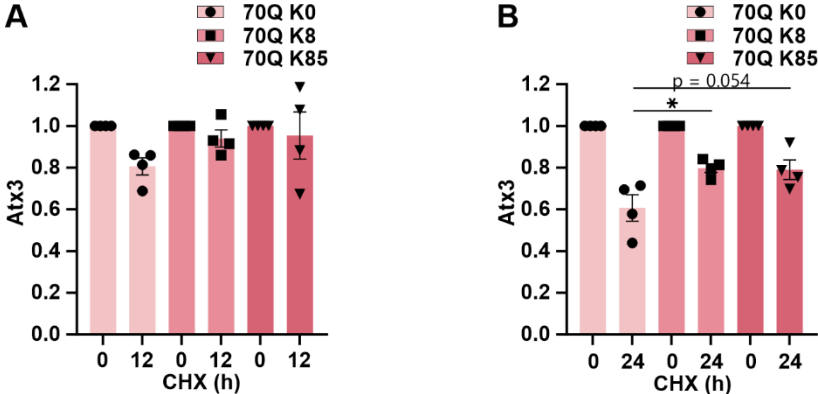

**Supplementary Figure 5. Stability of ataxin-3 is increased by reactivation of K8 and K85.** Densitometric quantification of soluble protein levels of ataxin-3 at the 12-h (A) or 24-h (B) time points as assessed by the cycloheximide (CHX) chase assay (see Figure 3A). n = 4, one-way ANOVA with Tukey post-hoc test, 70Q K0 vs 70Q K8, *p* = 0.04.

## Lysine residues of ataxin-3

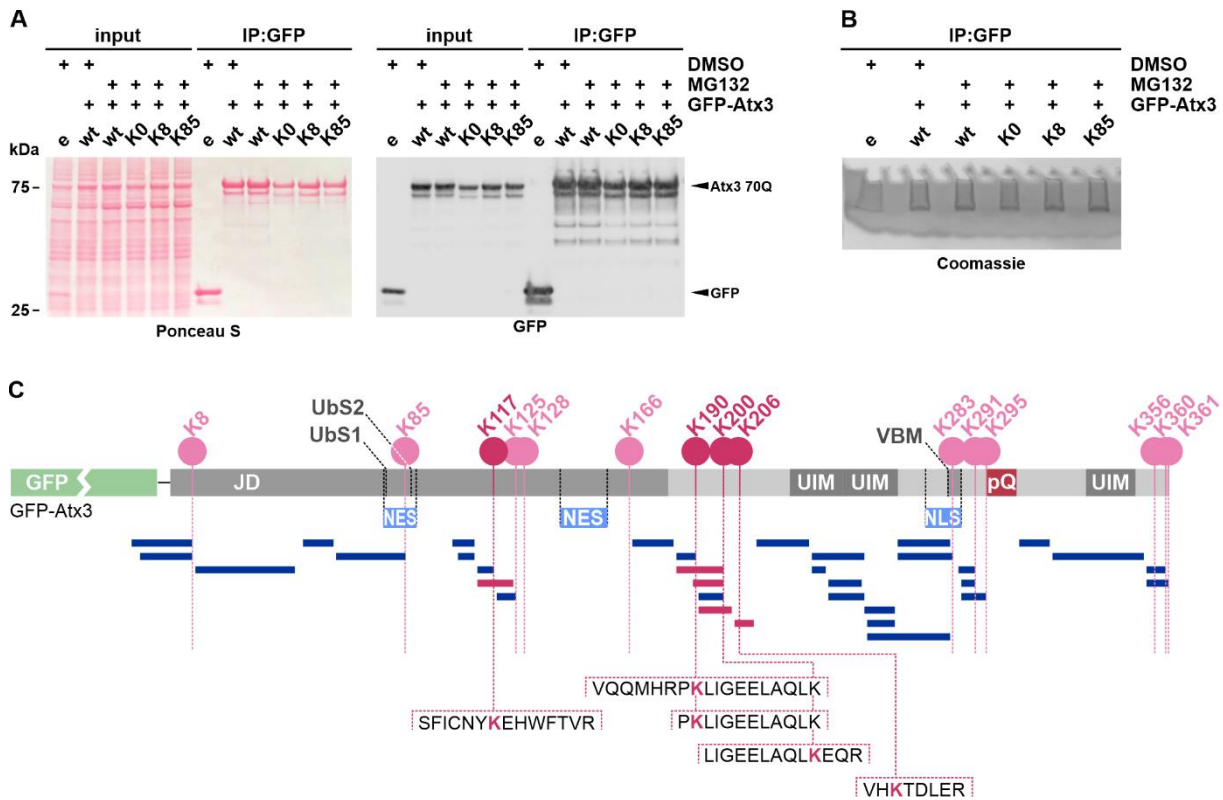

**Supplementary figure 6. Identification of ubiquitinated lysine residues within ataxin-3 via mass-spectrometry analysis. (A)** Western blotting of immunoprecipitated (IP) GFP-tagged ataxin-3 (GFP-Atx3). GFP-Atx3 constructs were overexpressed in 293T *ATXN3*<sup>-/-</sup> cells, which were further treated with DMSO or MG132 and subjected to GFP tag-specific IP. Ponceau S staining served as loading and purity control and the membrane was probed to GFP. **(B)** Samples from (A) were subjected to a short electrophoresis before a Coomassie brilliant blue gel staining, followed by the excision of the sample-containing lanes for mass spectrometry (MS) analysis. **(C)** Graphical representation of the resulting MS-based analysis of ubiquitination in ataxin-3. Horizontal bars represent the identified peptides. Blue bars, unmodified peptides. Red bars, peptides containing ubiquitinated lysine residues (GlyGly modified). Specific amino acid sequences of the peptides containing ubiquitinated sites (K) are also represented. Lysine residues in pink represent not covered or not ubiquitinated sites.

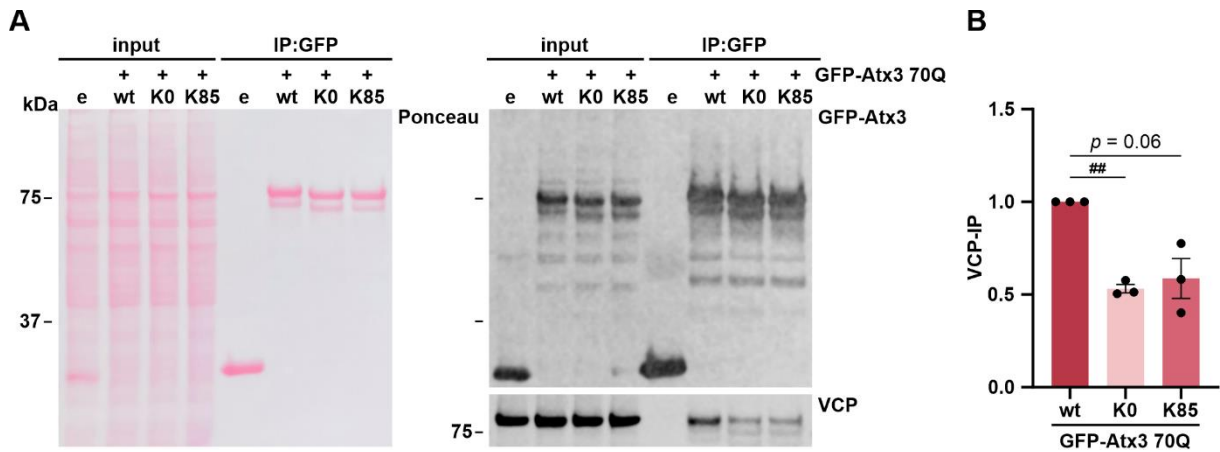

**Supplementary Figure 7. Lysine-free and single lysine ataxin-3 conserve the physiological binding to the ATPase valosin-containing protein. (A)** Co-IP-based ataxin-3 interaction analysis. Western blot of immunoprecipitated GFP empty (e) and different GFP-Atx3 70Q lysine variants expressed in 293T *ATXN3*<sup>-/-</sup> cells. IP-based purification was confirmed via Ponceau S staining. Membrane was probed for the co-precipitated ataxin-3 interaction partner ATPase valosin-containing protein (VCP). **(B)** Densitometric quantification of VCP from (A) demonstrated a conserved, yet reduced binding to GFP-Atx3 70Q K0 and 70Q K85 in comparison to 70Q wt. n = 3, one-sample *t*-test, 70Q wt vs 70Q K0,  $p = 0.002$ . Data is represented as means  $\pm$  SEM. ##  $p \leq 0.01$ .



## Supplementary Tables

**Supplementary Table 1. Nucleotide sequences of gBlocks™ used for cloning lysine-free and single lysine-reactivated GFP-ataxin-3 constructs.** Nucleotides underlined indicate the cutting site for the restriction enzymes listed in Supplementary Table 2.

**gBlock A:**

ccggactcagatctcgagctccttaagcccaggacctggcatggagtcctatcttccacgag  
aaacaagaaggctcactttgtgctcaacattgcctgaataacttattgcaaggagaatatt  
ttagccctgtggaattatcctcaattgcacatcagctggatgaggaggagaggatgagaat  
ggcagaaggaggagttactagtgaagattatcgcacgtttttacagcagccttctggaat  
atggatgacagtggttttttctctattcagggtataagcaatgccttgaaagtttggggtt  
tagaactaatcctggttcaacagtccagagtatcagaggctcaggatcgatcctataaatga  
aagatcatttatatgcaattataaggaacactggtttacagttagaaaattaggaaaacag  
tggtttaacttgaattctctcttgacgggtccagaattaatcagatacatatcttgac  
ttttcttggtcaattacaacaggaaggttattctatatttgtcggttaagggtgatctgcc  
agattgcgaagctgaccaactcctgcagatgattagggccaacagatgcatcgacccaaa  
cttattggagaagaattagcacaactaaaagagcaaagagtcataaaacagacctggaac  
gagtggttagaagcaaatgatggctcaggaatgtagacgaagatgaggaggatttgcagag  
ggctctggcactaagtcgccaagaaattgacatggaagatgaggaagcagatctccgcagg  
gctattcagctaagtatgcaaggtagttccagaaacatatctcaagatatgacacagacat  
caggtacaaatcttacttcagaagagcttcggaagagacgagaagcctactttgaaaaaca  
gcagcaaaagcagcaacagcaacagcaacagcaacagcaacagcaacagcagggggac  
ctatcaggacagag

**gBlock B:**

ccggactcagatctcgagctccttaagcccaggacctggcatggagtcctatcttccacgag  
aaacaagaaggctcactttgtgctcaacattgcctgaataacttattgcaaggagaatatt  
ttagccctgtggaattatcctcaattgcacatcagctggatgaggaggagaggatgagaat  
ggcagaaggaggagttactagtgaagattatcgcacgtttttacagcagccttctggaat  
atggatgacagtggttttttctctattcagggtataagcaatgccttgaaagtttggggtt  
tagaactaatcctggttcaacagtccagagtatcagaggctcaggatcgatcctataaatga  
aagatcatttatatgcaattataggaacactggtttacagttagaagattaggaagacag  
tggtttaacttgaattctctcttgacgggtccagaattaatcagatacatatcttgac  
ttttcttggtcaattacaacaggaaggttattctatatttgtcggttaagggtgatctgcc  
agattgcgaagctgaccaactcctgcagatgattagggccaacagatgcatcgaccaaga  
cttattggagaagaattagcacaactaaaagagcaaagagtcataagaacagacctggaac  
gagtggttagaagcaaatgatggctcaggaatgtagacgaagatgaggaggatttgcagag  
ggctctggcactaagtcgccaagaaattgacatggaagatgaggaagcagatctccgcagg  
gctattcagctaagtatgcaaggtagttccagaaacatatctcaagatatgacacagacat  
caggtacaaatcttacttcagaagagcttcggaagagacgagaagcctactttgaaagaca  
gcagcaaaagcagcaacagcaacagcaacagcaacagcaacagcaacagcagggggac  
ctatcaggacagag

**Supplementary Table 2. Nucleotide sequences and restriction enzymes employed for generating lysine-free and single lysine-reactivated GFP-ataxin-3 constructs.** All constructs are based on a pEGFP-C2 backbone carrying the cDNA of the canonical isoform of Atx3 (isoform 2, UniProt: P54252-2). **R**, A or G; **W**, A or T; **Y**, C or T; **N**, A, T, C or G.

| <b>EGFP-ataxin-3 construct</b>            | <b>Restriction enzymes (including sites) or primers (R: reverse)</b>             |
|-------------------------------------------|----------------------------------------------------------------------------------|
| K0 15Q/70Q<br>(lysine-free)               | 5': SacI (5' GAGCTC 3')<br>3': Esp3I (5' GAGACG 3')<br>3': PpuMI (5' RGGWCCY 3') |
| K8 15Q/70Q<br>(reintroduced lysine 8)     | 5': SacI (5' GAGCTC 3')<br>3': SpeI (5' ACTAGT 3')                               |
| K85 15Q/70Q<br>(reintroduced lysine 85)   | 5': SpeI (5' ACTAGT 3')<br>3': EcoRI (5' GAATTC 3')                              |
| K117 15Q/70Q<br>(reintroduced lysine 117) | R:<br>gagagaattcaagttaaacactgtcttctaatcttctaact<br>gtaaaccagtggtcctataattg       |
| K166 15Q/70Q<br>(reintroduced lysine 166) | 5': EcoRI (5' GAATTC 3')<br>3': PstI (5' CTGCAG 3')                              |
| K200 15Q/70Q<br>(reintroduced lysine 200) | 5': PstI (5' CTGCAG 3')<br>3': XmnI (5' GAANNNTTC 3')                            |

**Supplementary Table 3. Primary antibodies for western blot analysis.**

| Antibody/target                  | Host   | Dilution | Clone/catalog no. | Vendor         |
|----------------------------------|--------|----------|-------------------|----------------|
| $\beta$ -actin                   | mouse  | 1:5,000  | AC-15/A5441       | Sigma-Aldrich  |
| ataxin-3                         | mouse  | 1:5,000  | 1H9/MAB5360       | Merck          |
| ataxin-3 (N-terminal)            | rabbit | 1:500    | ARP50507_P050     | Aviva          |
| caspase-7                        | rabbit | 1:1,000  | #9492             | Cell Signaling |
| GAPDH                            | mouse  | 1:2,000  | 0411/sc-47724     | Santa Cruz     |
| GFP                              | mouse  | 1:1,000  | sc-9996           | Santa Cruz     |
| LC3B                             | rabbit | 1:1,000  | #2775             | Cell Signaling |
| PARP1                            | rabbit | 1:2,500  | 13371-1-AP        | ProteinTech    |
| ubiquitin                        | mouse  | 1:1,000  | P4D1/sc-8017      | Santa Cruz     |
| ubiquitin (K48-linkage specific) | rabbit | 1:1,000  | D9D5/#8081        | Cell Signaling |
| VCP                              | rabbit | 1:250    | sc-20799          | Santa Cruz     |

**Supplementary table 4. GFP-ataxin-3 peptides containing ubiquitinated (GlyGly) lysine (K) residues identified via mass spectrometry-based analysis.**

| GlyGly (K) peptides | Protein | Sample   |             |              |              |              |               |
|---------------------|---------|----------|-------------|--------------|--------------|--------------|---------------|
|                     |         | GFP DMSO | 70Q wt DMSO | 70Q wt MG132 | 70Q K0 MG132 | 70Q K8 MG132 | 70Q K85 MG132 |
| TIFFKDDGNYK         | GFP     |          | ✓           | ✓            | ✓            | ✓            | ✓             |
| LEYNYNSHNVYIMADKQK  | GFP     |          | ✓           | ✓            |              |              |               |
| SFICNYKEHWFTVR      | Atx3    |          | ✓           |              |              |              |               |
| VQQMHRPKLIGEELAQLK  | Atx3    |          | ✓           | ✓            |              |              |               |
| PKLIGEELAQLK        | Atx3    |          | ✓           | ✓            |              |              |               |
| LIGEELAQLKEQR       | Atx3    |          | ✓           | ✓            |              |              |               |
| VHKTDLER            | Atx3    |          | ✓           | ✓            |              |              |               |
